# Supplementary material
Source: ML conference proceedings conference paper supplement (https://openaccess.thecvf.com/content/CVPR2022/html/Ntavelis_Arbitrary-Scale_Image_Synthesis_CVPR_2022_paper.html)

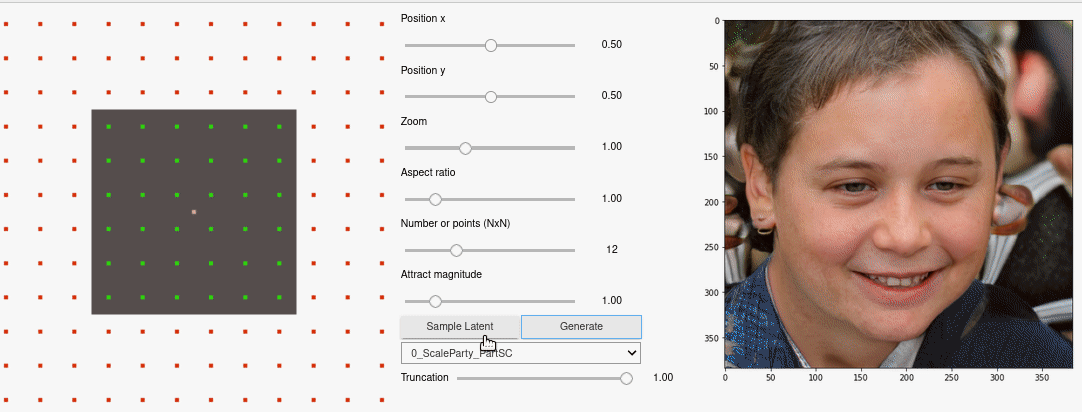

Supplement: Supplementary file 2 [file Ntavelis_Arbitrary-Scale_Image_Synthesis_CVPR_2022_supplemental.zip › 06259-supp.gif]
